# Supplementary material
Source: PubMed Central journal article supplement (PMC3165647)
Supplement: supp_193_18_4925__1.pdf [file supp_193_18_4925__1.pdf]

Figure S1

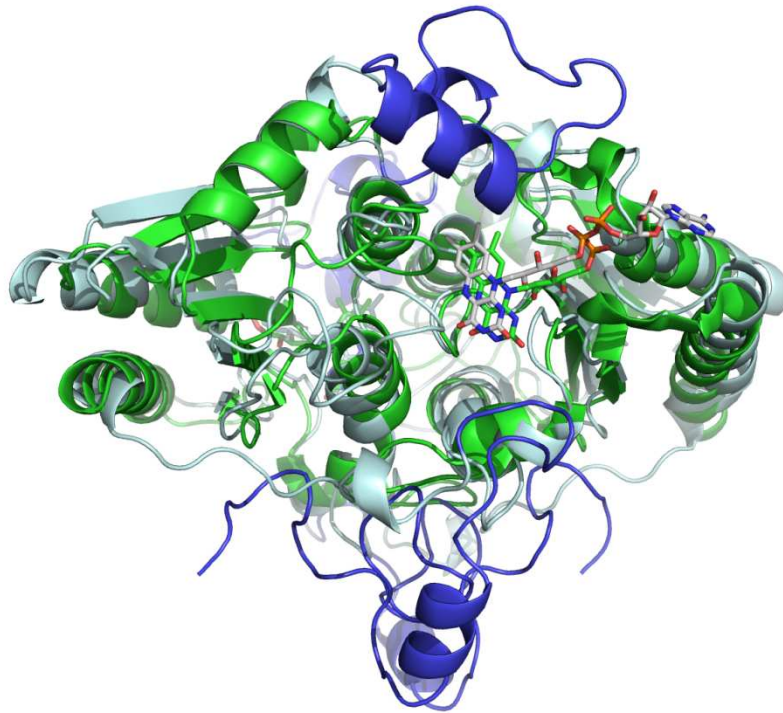

**Figure S1: Structural alignment of KefF and human QR1.** The crystal structure of KefF (pdb 3EYW, green) was aligned with human QR1 (pdb 1QBG, light blue) using PyMOL. QR1 has an insertion in comparison to KefF from residue 48-80 (ink blue, top), which is also found in QR2 and partially caps the active site. QR1 also has an extended C-terminus from residue 226 (ink blue, bottom) which is neither found in KefF nor in QR2.

Figure S2

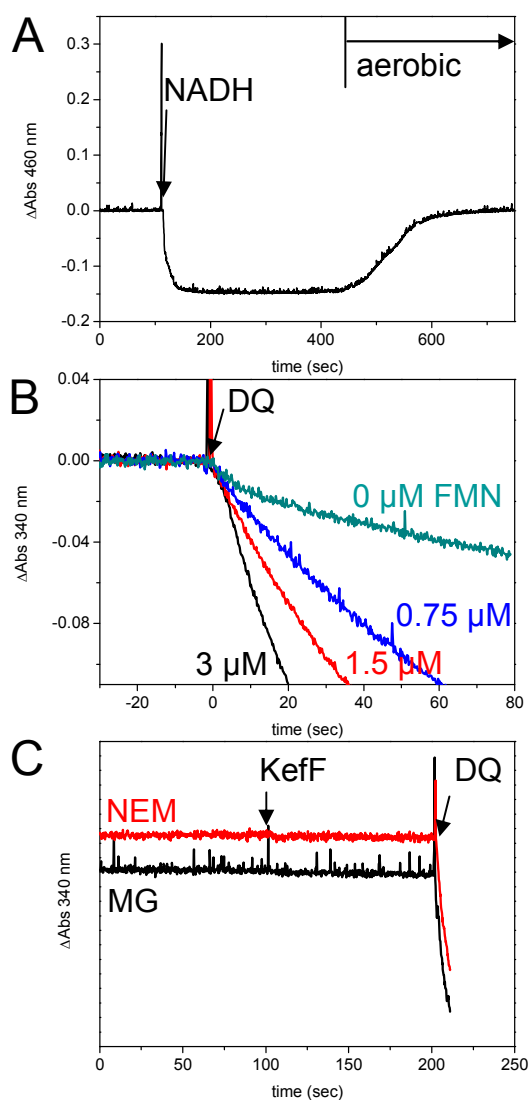

**Figure S2: Catalytic properties of KefF.** (A) An anaerobic solution of 19  $\mu\text{M}$  KefF in a closed, stirred cuvette was reduced with 35  $\mu\text{M}$  NADH. After 5 minutes, the seal was removed. The absorbance change at 460 nm was recorded. (B) KefF was incubated with different amounts of FMN in the assay buffer for 3 min before the reaction was started with duroquinone (DQ). (C) No oxidation of NADH was seen if NEM (red) or MG (black) was used as electron acceptor, while a fast reaction was seen with DQ. Traces are offset for clarity.

Figure S3

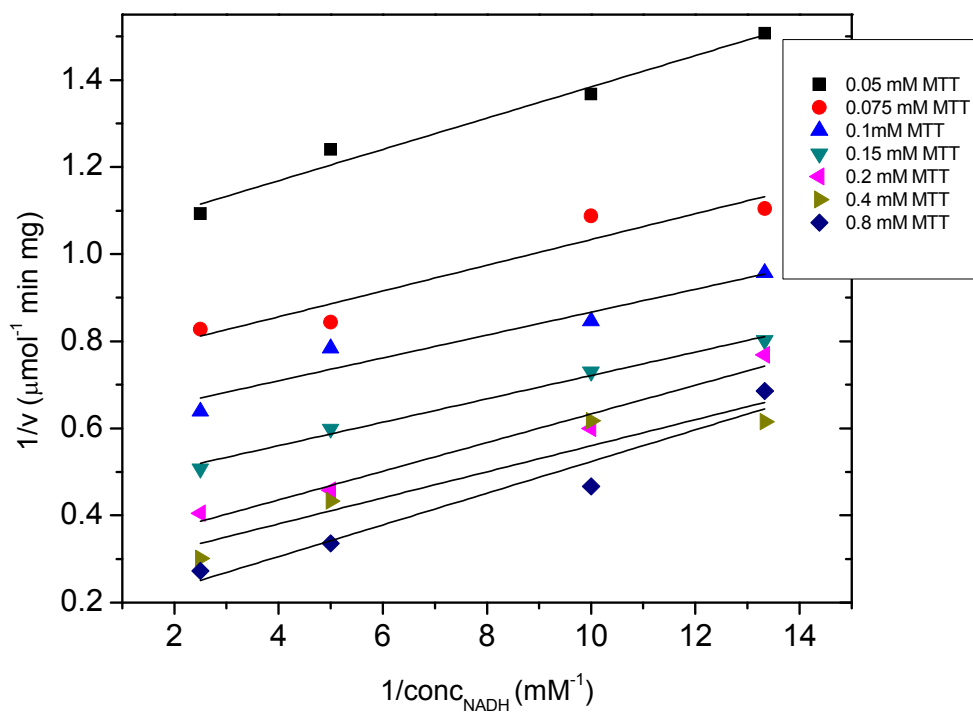

**Figure S3: Lineweaver Burk plot of KefF enzymatic activity.** Specific activities of KefF with NADH and MTT are plotted. Data were fitted by linear regression independently for each constant MTT concentration, respectively (lines).

Figure S4

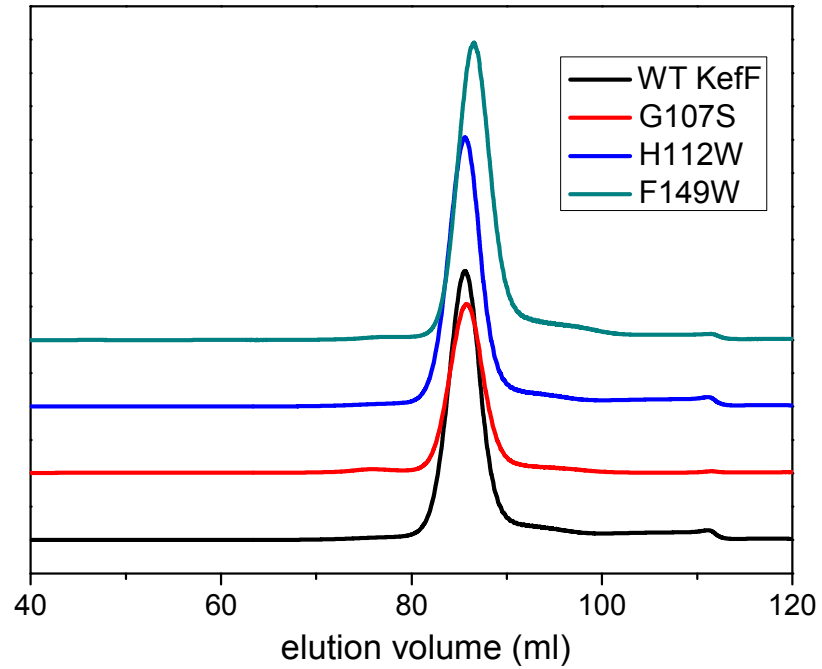

**Figure S4: Size exclusion chromatography of Keff.** The absorbance at 280 nm of Keff WT and mutants is shown (for clarity the baselines are offset).
